# Supplementary material for: Non-extensivity of thermodynamics at the nanoscale in molecular spin crossover materials: a balance between surface and volume
Source: Royal Society of Chemistry journal article supplement (doi:10.1039/c3cp55031a), 2014-01-01
Supplement: c3cp55031a1.pdf [file c3cp55031a1.pdf]

## Supplementary Information: Non-Extensivity of Thermodynamics at the Nanoscale in Molecular Spin Crossover Materials: A Balance between Surface and Volume

Gautier Félix,<sup>a</sup> William Nicolazzi,<sup>a</sup> Mirko Mikolasek,<sup>a</sup> Gábor Molnár,<sup>a</sup> and Azzedine Bousseksou,<sup>a,\*</sup>

### 1 Evaluation of the entropy by Monte Carlo simulations

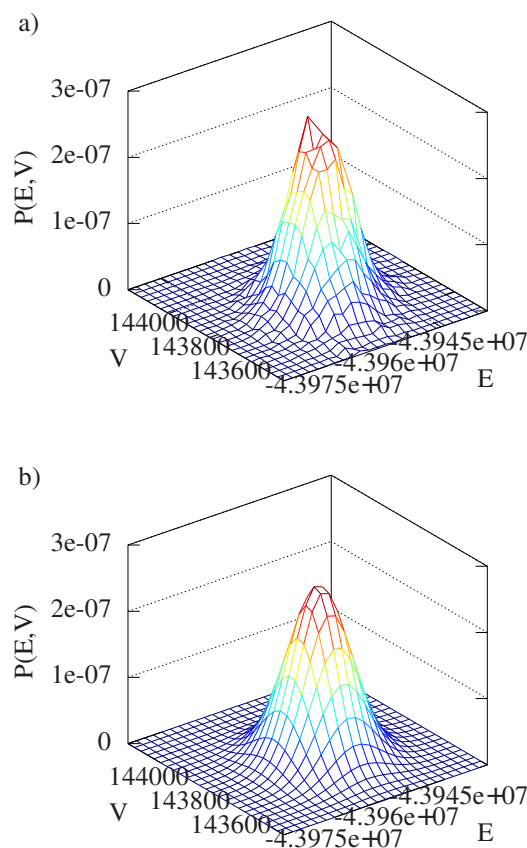

**Fig. S1** (a) 2D Histogram of probability density as a function of the volume and the energy for a 60x60 2D square system. (b) Fit by a 2D gaussian curve of the Histogram of probability density for a 60x60 2D square system.

To assess the entropy, the probability density of the system has to be estimated.

$$\langle S \rangle = -k_B \sum_i p(H_i, V_i) \log(p(H_i, V_i)) \quad (\text{S1})$$

We used the MC Histogram reweighting technique to extract the probability density (Figure S1). This technique was introduced by Ferrenberg and Swendsen<sup>S1</sup> for the canonical ensemble and extended to the

<sup>a</sup> LCC, CNRS and Université de Toulouse (UPS, INP), 205 route de Narbonne, F-31077 Toulouse, France

\* azzedine.bousseksou@lcc-toulouse.fr

isothermal-isobaric ensemble by Conrad and Pablo.<sup>S2</sup> The histogram  $h_{T,P}(H, V)$  for energies and volumes, which are associated with the successive visits from the simulation, is proportional to the density of states  $g(H, V)$ :

$$h_{T,P}(H, V) \propto g(H, V) e^{-(H+PV)/(k_B T)} \quad (\text{S2})$$

The density of probability of the system is given by:

$$p(H, V) = \frac{h_{T,P}(H, V)}{\int_{-\infty}^{+\infty} \int_0^{+\infty} dH dV h_{T,P}(H, V)} \quad (\text{S3})$$

Finally, the entropy is given by this following relation:

$$\langle S \rangle = \int_{-\infty}^{+\infty} \int_0^{+\infty} dH dV p(H, V) \log(p(H, V)) \quad (\text{S4})$$

## References

- S1 A. M. Ferrenberg and R. H. Swendsen, *Phys. Rev. Lett.*, 1989, **63**, 1195–1198.  
 S2 P. Conrad and J. de Pablo, *Fluid Phase Equilibri.*, 1998, **150–151**, 51–61.
